# Supplementary material
Source: publisher figshare collection journal article supplement (https://acs.figshare.com/ndownloader/files/5182642)
Supplement: Supplementary file 1 [file 5182642]

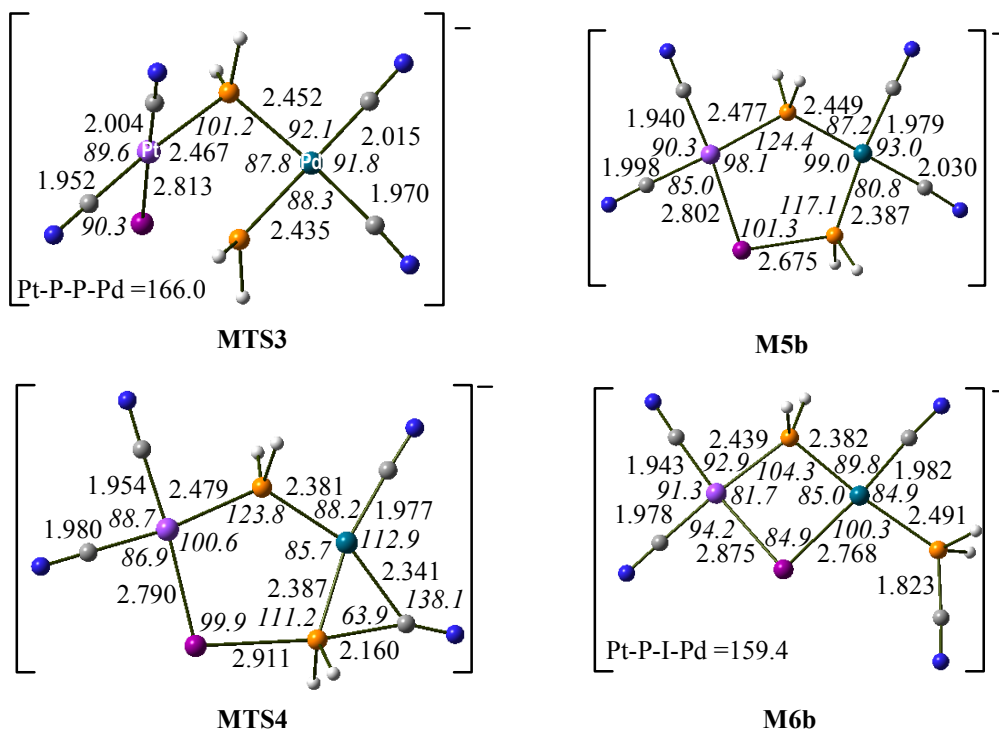

**Figure S5.** Equilibrium geometries (bond lengths in Å, bond angles in degrees) of all species involved in the intramolecular reductive coupling in the  $[(\text{CN})_2\text{Pt}(\mu\text{-PH}_2)_2\text{Pd}(\text{CN})_2]$  complex promoted by  $\text{I}^-$  anions.
